# Supplementary figures and images for: Tissue attenuation imaging and tissue scatter imaging for quantitative ultrasound evaluation of hepatic steatosis
Source: PubMed Central journal article supplement — Medicine (Baltimore). 2022 Aug 19;101(33):e29708. doi: 10.1097/MD.0000000000029708 (PMC9387959; doi:10.1097/md.0000000000029708), 2022-08-19

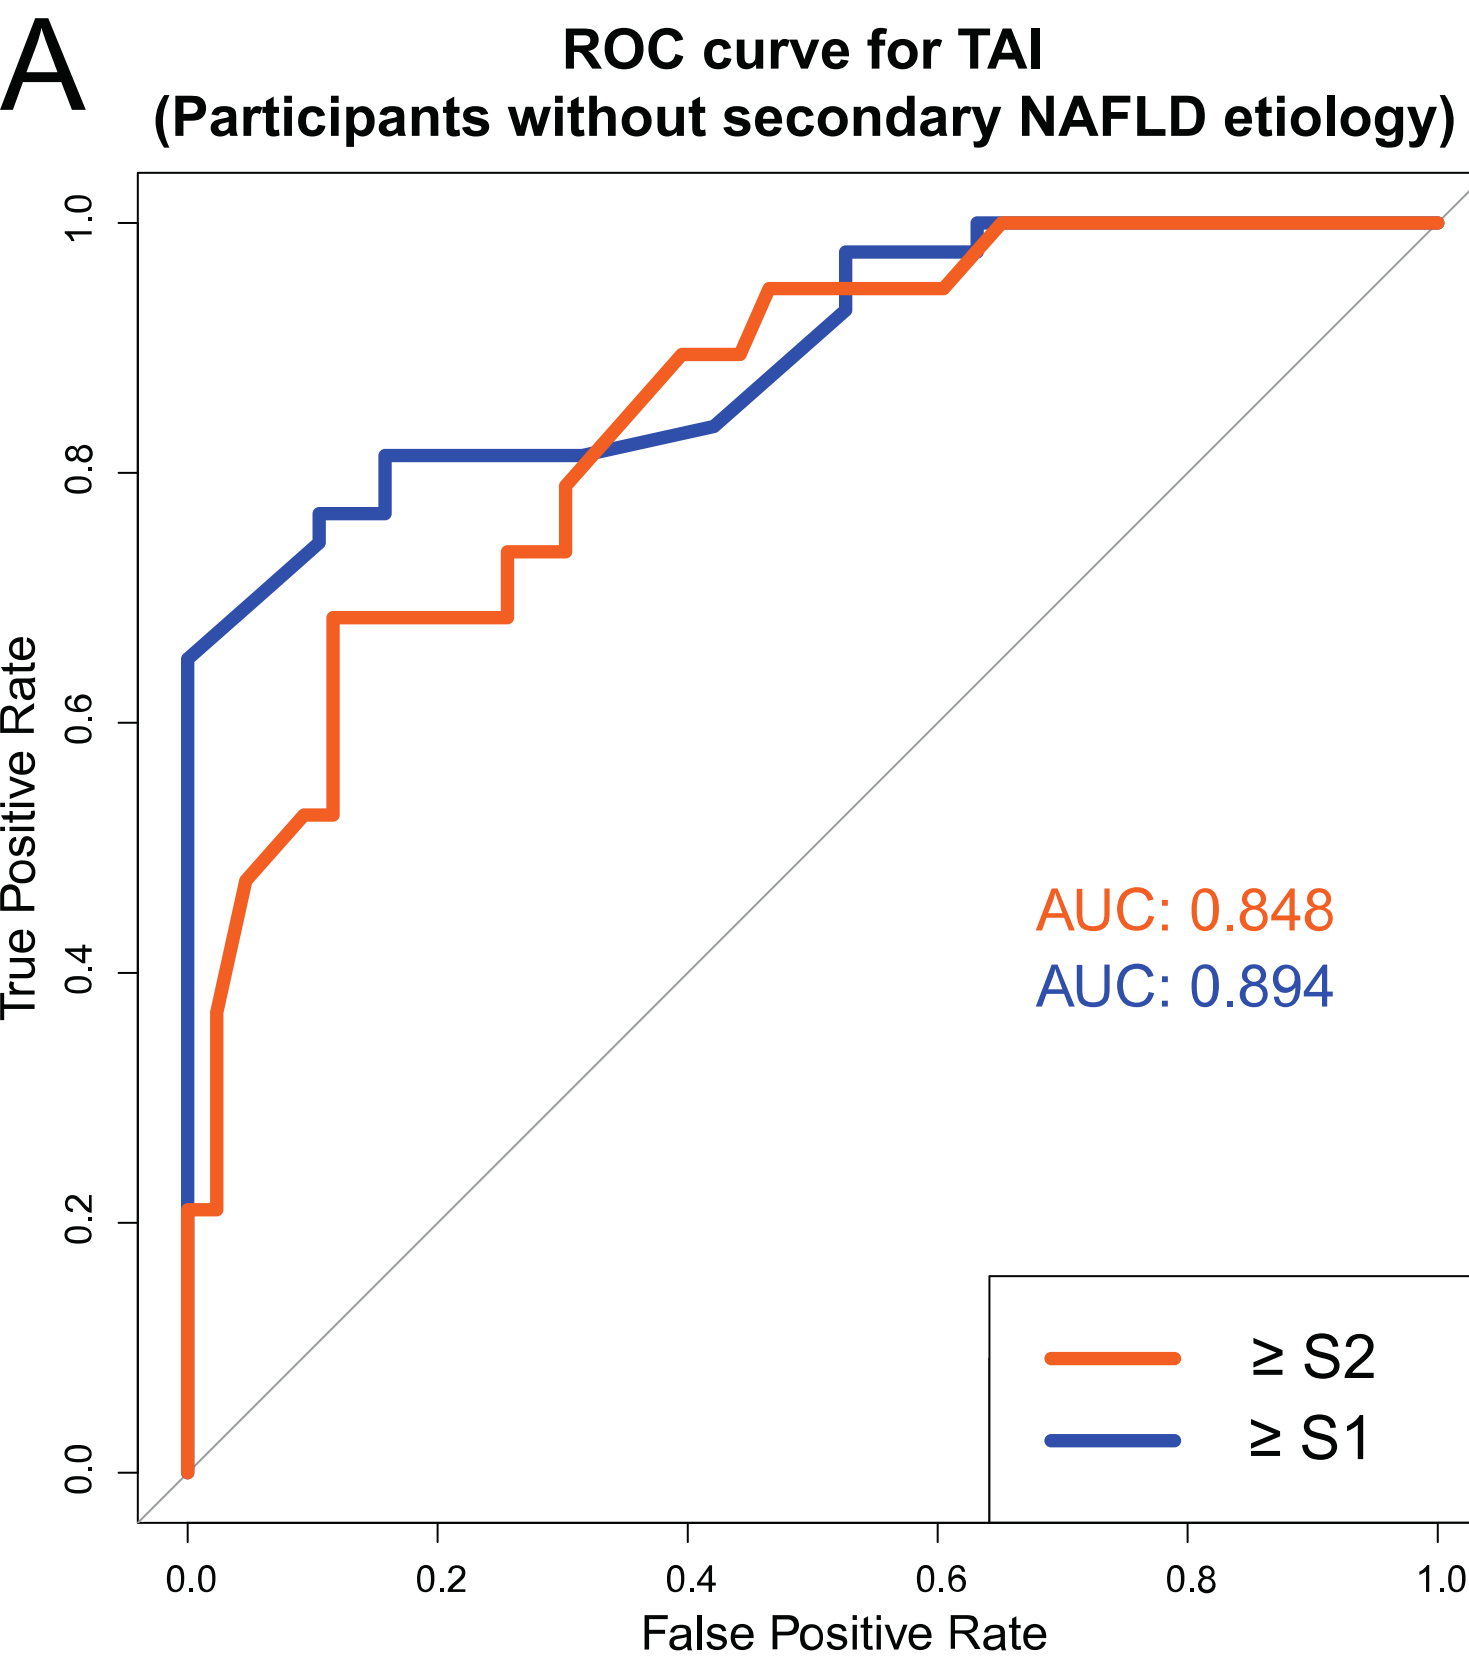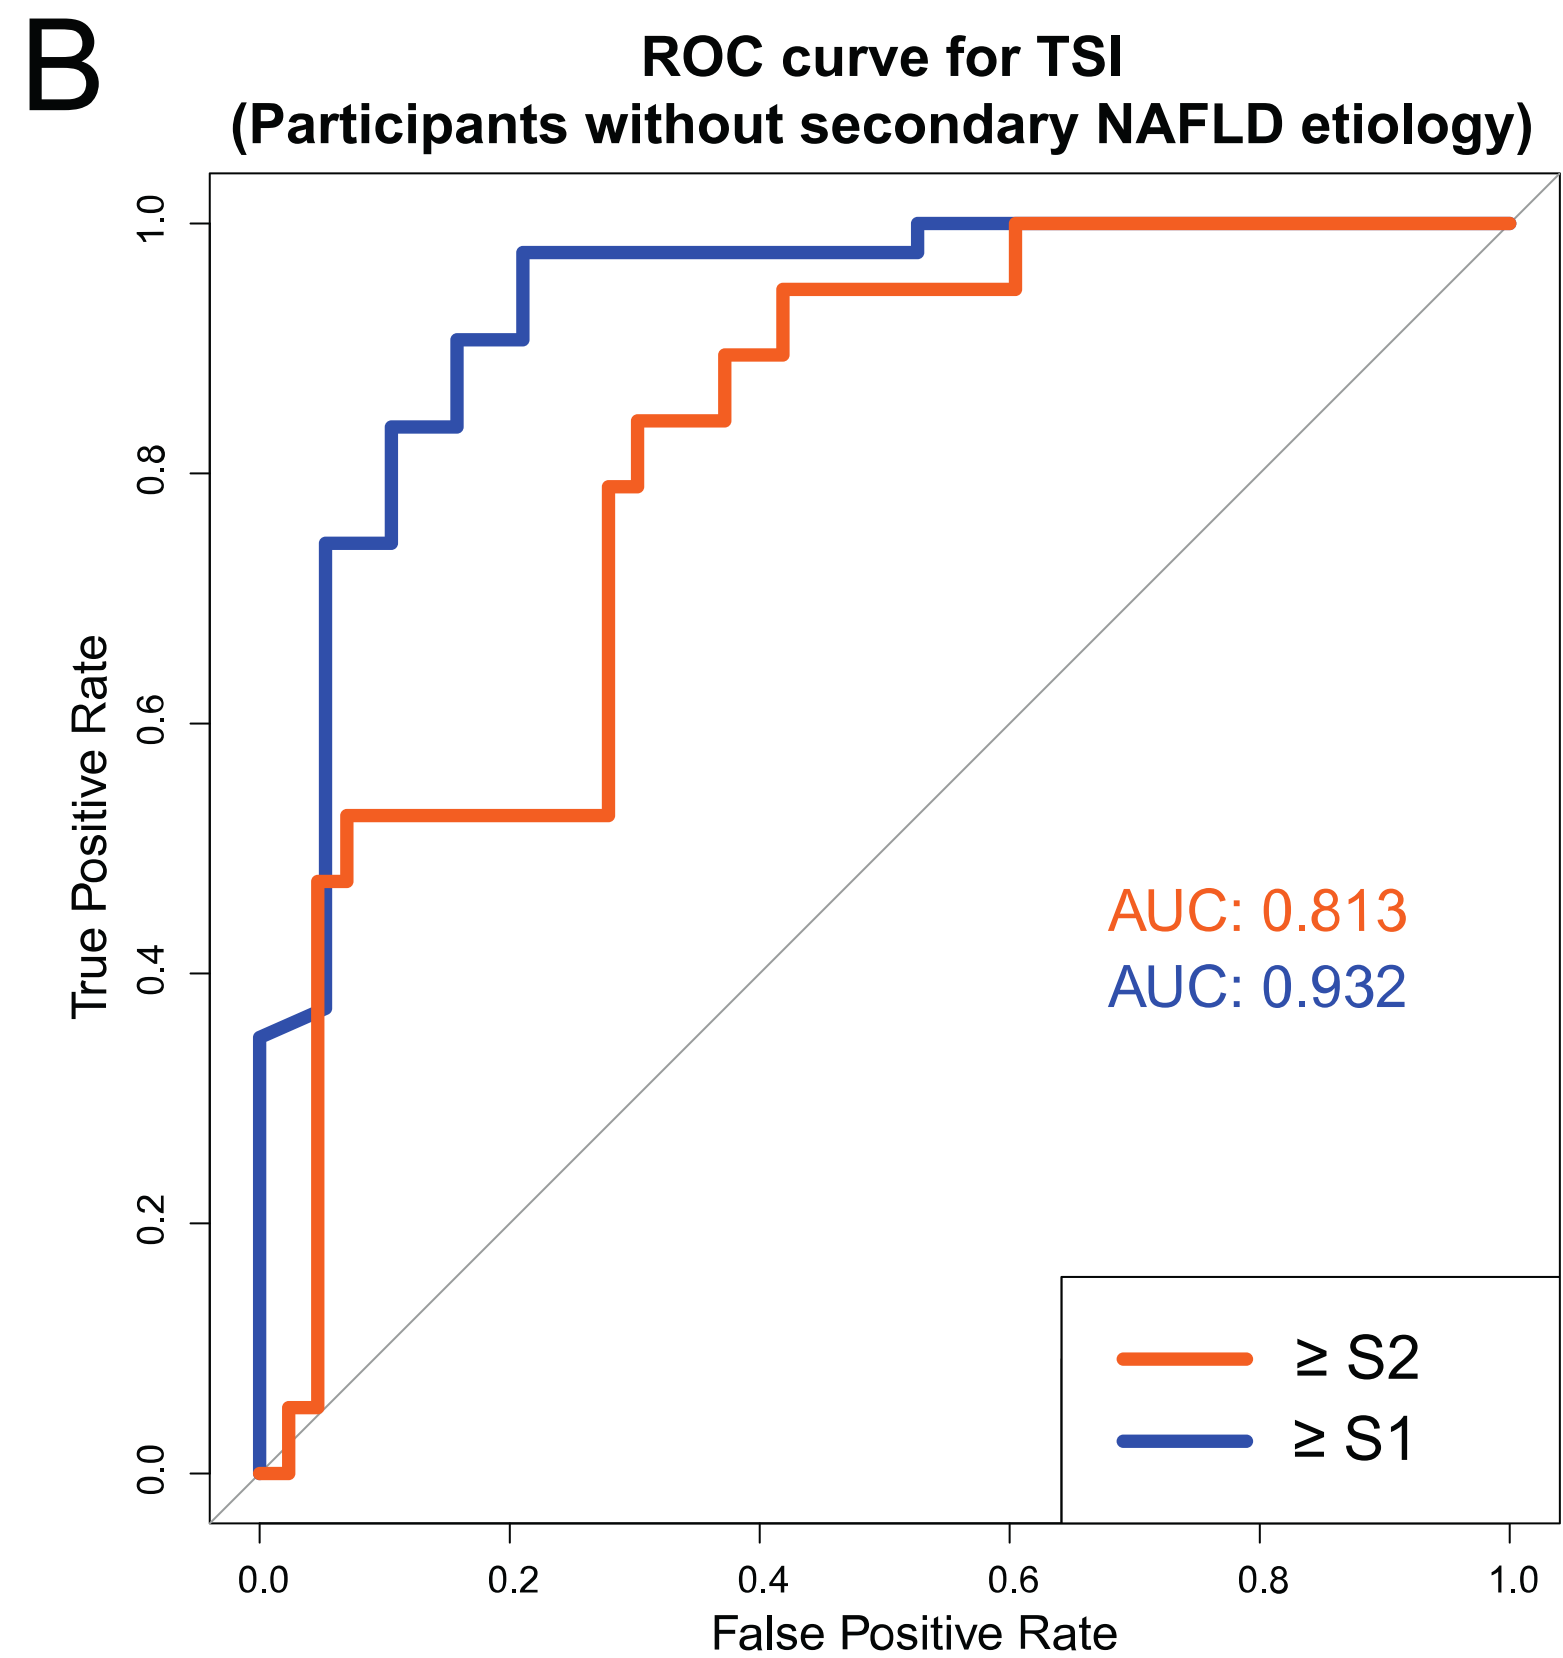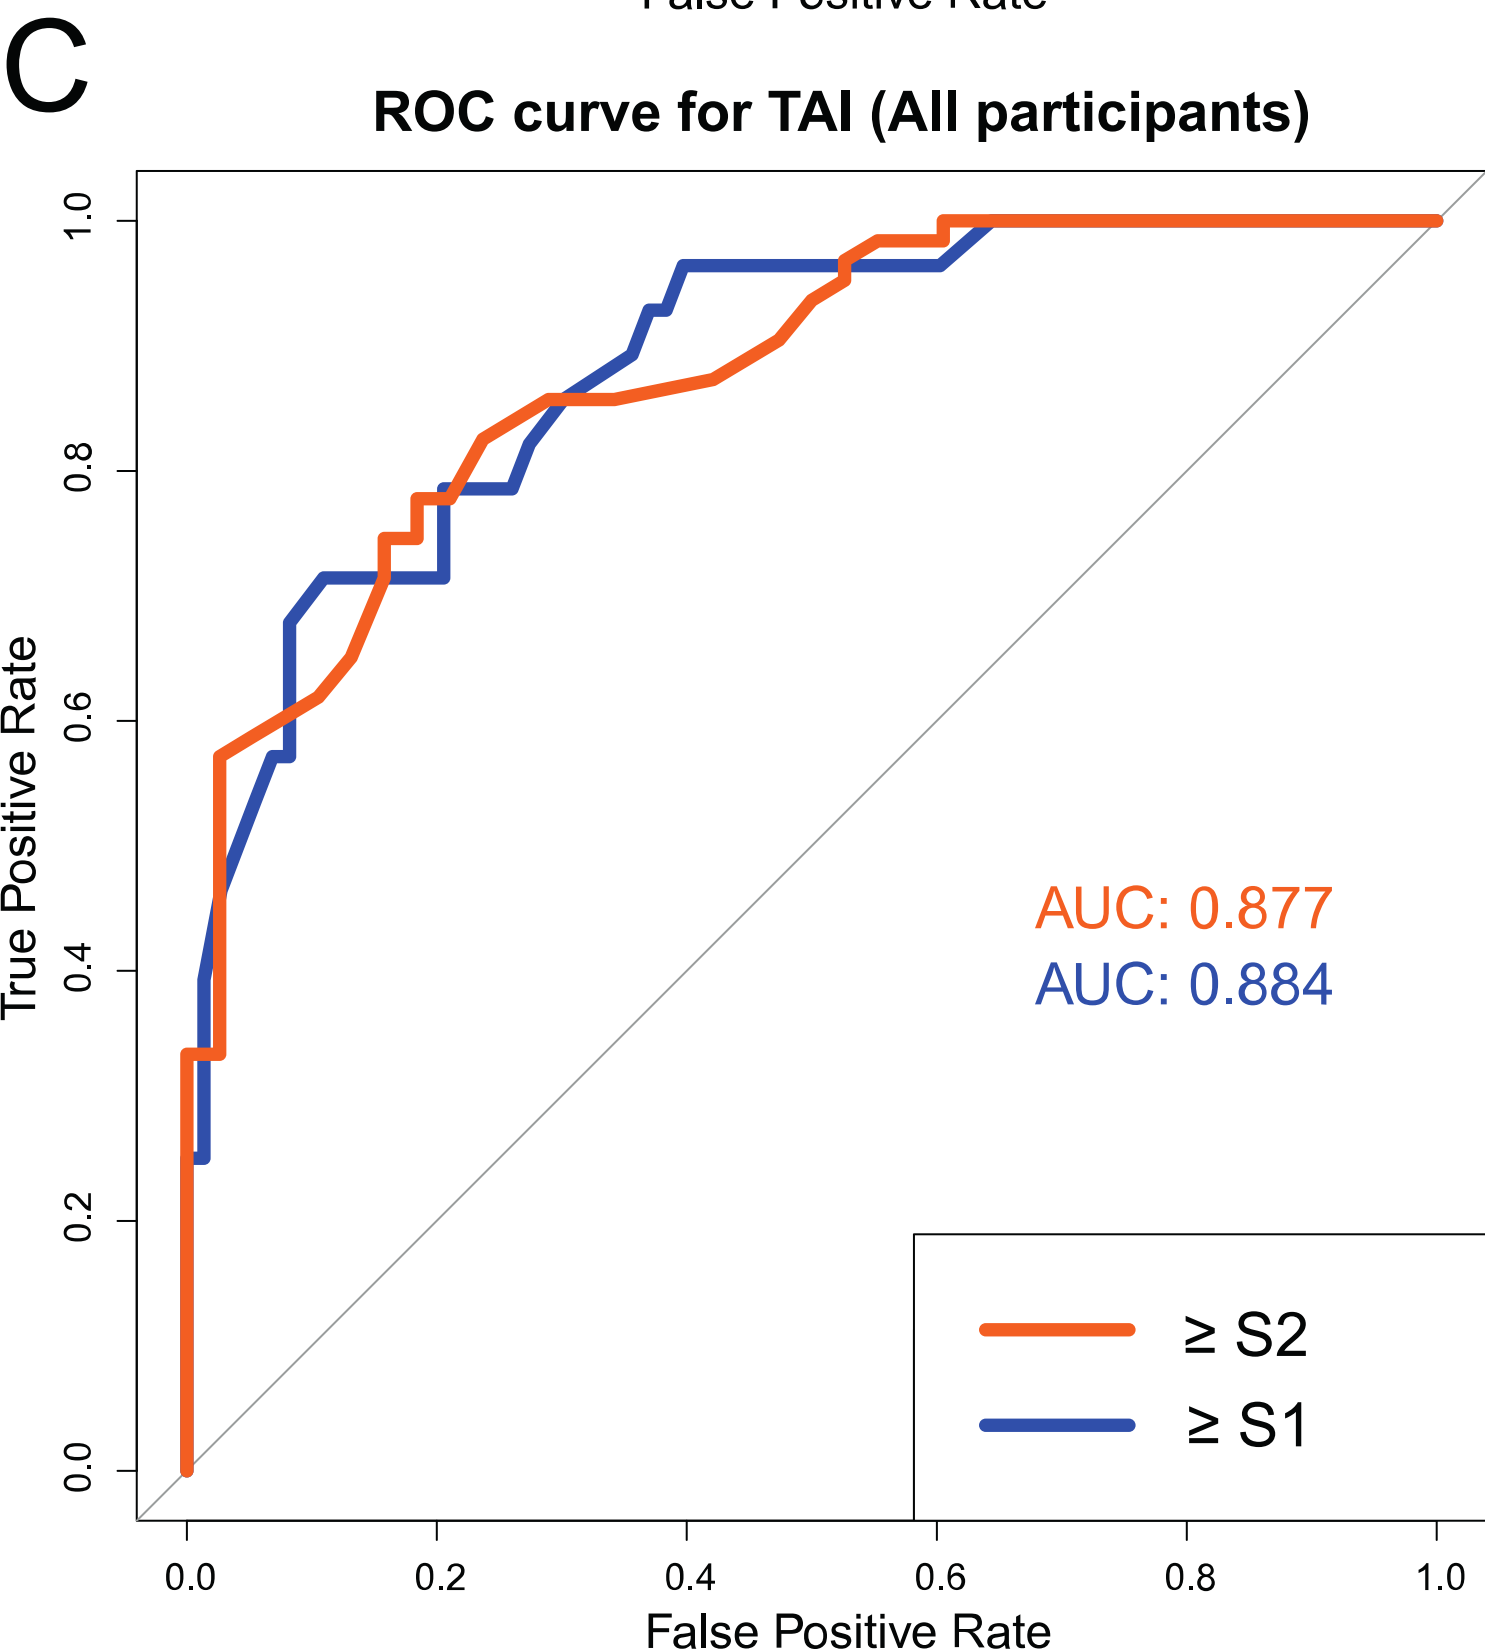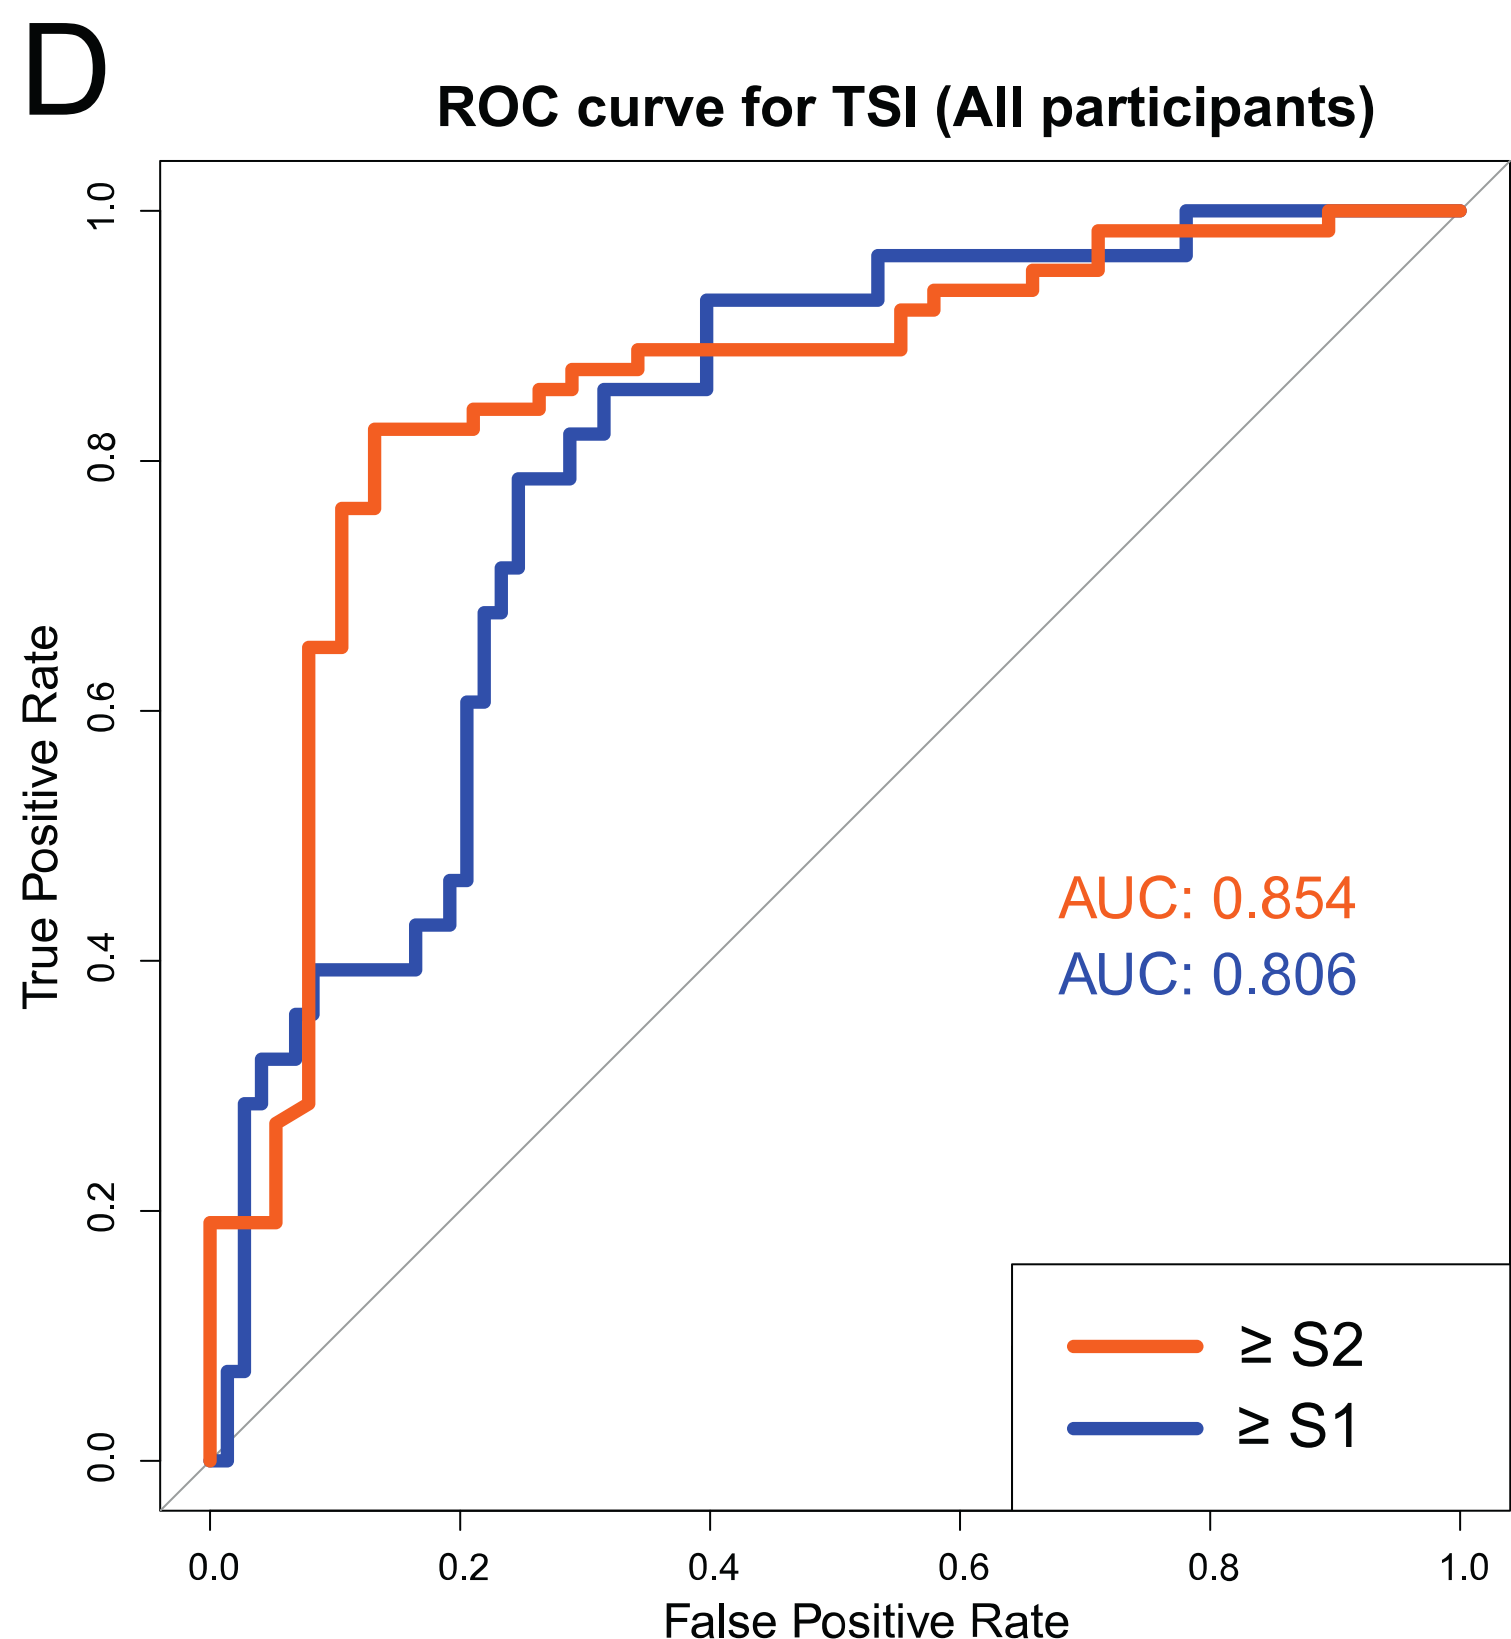

Supplement: medi-101-e29708-s003.pdf [file medi-101-e29708-s003.pdf]

**A**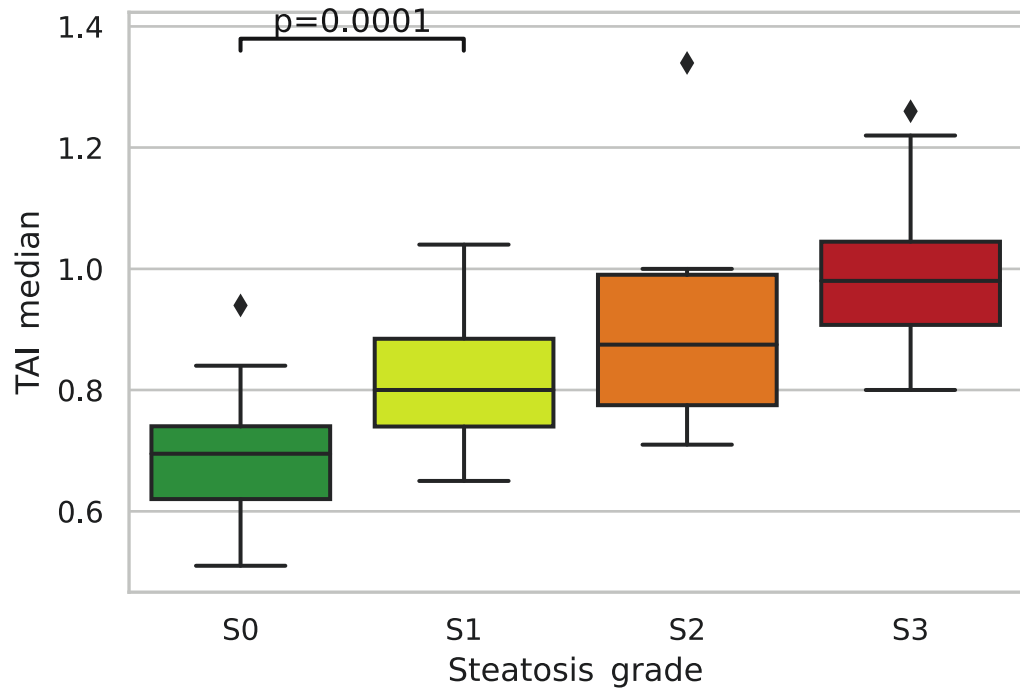**B**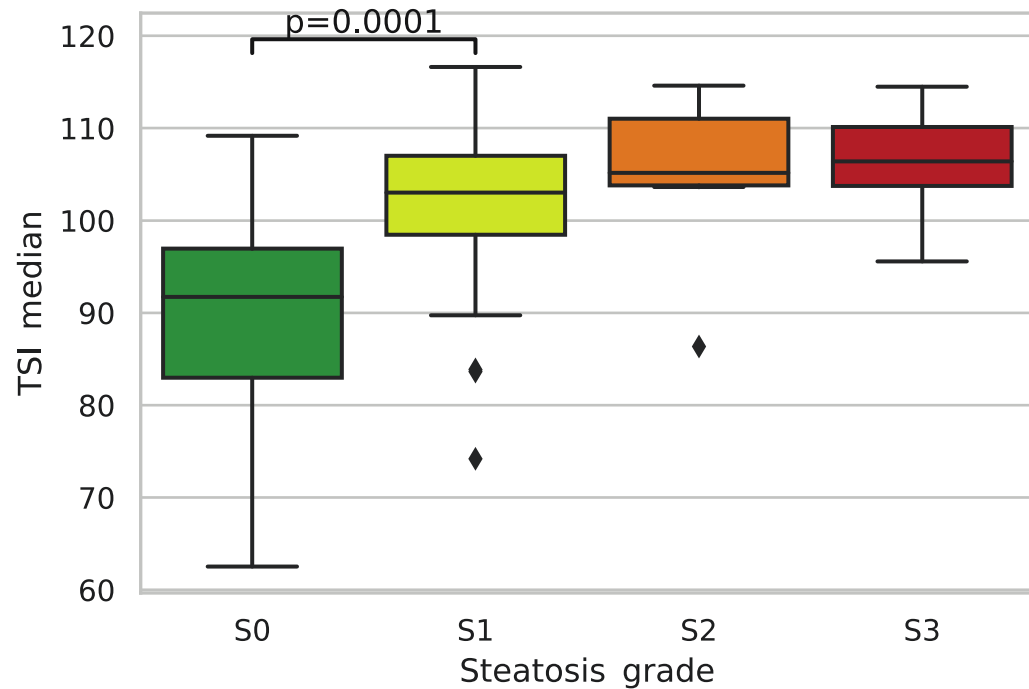

Supplement: medi-101-e29708-s004.pdf [file medi-101-e29708-s004.pdf]
